# Supplementary material
Source: Springer Nature journal article supplement (https://www.springermedizin.de/resource/supplementary/12888_2007_469_MOESM1_ESM.pdf/9483344)
Supplement: MOESM1 [file 9483344]

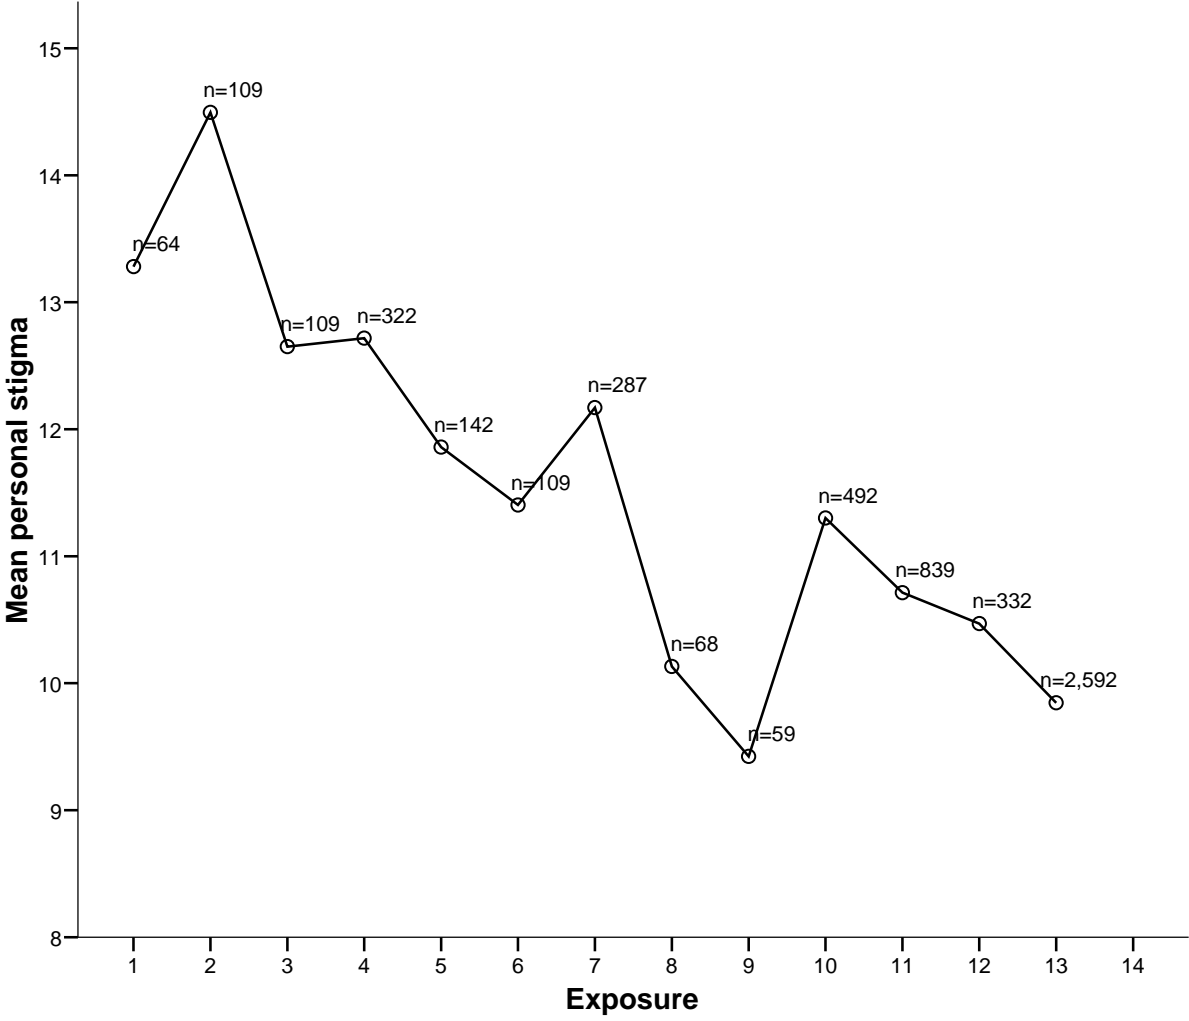

- Key**
- No. Level of Exposure
  - 1 No exposure
  - 2 Have never observed person who may have had depression
  - 3 Have observed person who may have had depression
  - 4 Have watched movie/tv depicting person with depression
  - 5 Have watched documentary depicting person with depression
  - 6 Have observed people with depression on a frequent basis
  - 7 Have worked with person with depression
  - 8 Job involves providing services to people with depression
  - 9 Job involves providing treatment to people with depression
  - 10 Friend of family has depression
  - 11 Relative has depression
  - 12 Live with person with depression
  - 13 Have suffered from depression
